# Supplementary material for: Potential relationship between high wall shear stress and plaque rupture causing acute coronary syndrome
Source: Research Square preprint supplement (doi:10.21203/rs.3.rs-629630/v1), 2021-06-18
Supplement: Supplementary file 1 [file af5cfa7b0aa478353ffac8bf.docx]

**Online Resource 3. Baseline clinical characteristics**

| Baseline clinical characteristics (n=100) | |
| --- | --- |
| Patients | |
| Age, years | 68.4±13.5 |
| Men | 80 (80.0%) |
| Body mass index, kg/m2 | 24.0±3.2 |
| Hypertension | 64 (64.0%) |
| Dyslipidaemia | 62 (62.0%) |
| Diabetes mellitus | 46 (46.0%) |
| Smoking | 61 (61.0%) |
| Family history of coronary artery disease | 15 (15.0%) |
| Lesion characteristics |  |
| Lesion location |  |
| Left anterior descending artery | 49 (49.0%) |
| Left circumflex artery | 18 (18.0%) |
| Right coronary artery | 33 (33.0%) |
| Optical coherence tomography analysis |  |
| Lesion length, mm | 32.0 (20.0-45.1) |
| Minimum lumen area, mm2 | 1.15 (0.84-1.50) |
| Reference lumen area, mm2 | 5.96 (4.53-7.09) |
| Per cent area stenosis, % | 88.2 (83.2-91.6) |
| Values are mean ± standard deviation, median (interquartile range), or n (%) | |
